# Supplementary material for: A colorimetric sensor array for rapid discrimination of edible oil species based on a halogen ion exchange reaction between CsPbBr3 and iodide
Source: Royal Society of Chemistry journal article supplement (doi:10.1039/d1an02109e), 2021-12-13
Supplement: d1an02109e1.pdf [file d1an02109e1.pdf]

## Supporting information

### **Colorimetric Sensor Array for Rapid Discrimination of Edible Oil Species Based on Halogen Ion Exchange Reaction between CsPbBr<sub>3</sub> and Iodide**

Xin Zhang,<sup>†</sup> Xiaowei Feng,<sup>†</sup> Leon Lee Zhou, Bin Liu, Zhengbo Chen,\* Xia Zuo\*

Department of Chemistry, Capital Normal University, Beijing, 100048, China

E-mail: czb979216@sina.com, zuoxia@cnu.edu.cn

<sup>†</sup>These authors contribute this work equally

## **Table of content**

**Figure S1** Elemental mapping images of (a) CsPbBr<sub>3</sub> NCs, products that underwent anion exchange with (b) ODAI, and (c) ZnI, respectively.

**Figure S2.** Canonical score plots for colorimetric response patterns obtained with the sensor array against 3.33% edible oils.

**Table S1** Peroxide number of edible oils.

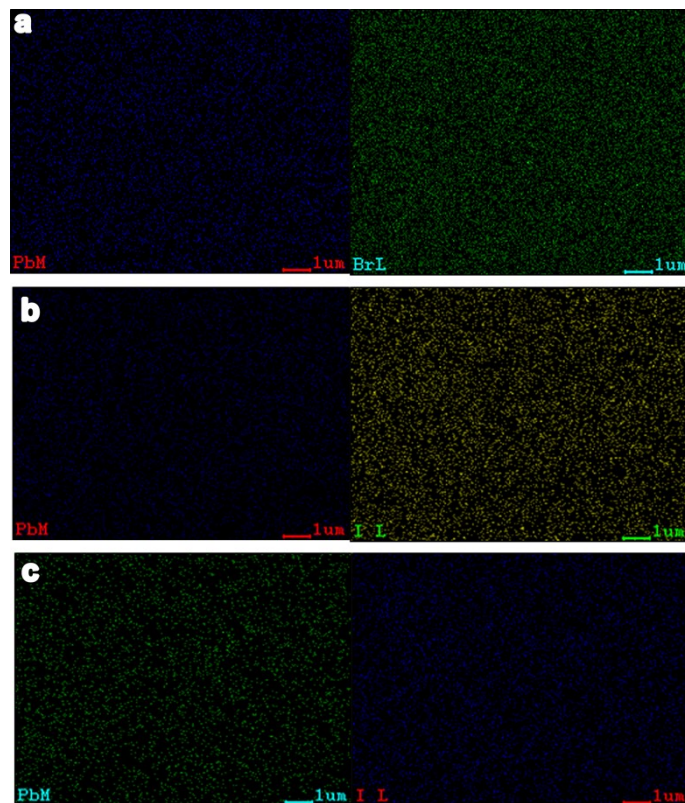

**Figure S1.** Elemental mapping images of (a) CsPbBr<sub>3</sub> NCs, products that underwent anion exchange with (b) ODAI, and (c) ZnI, respectively.

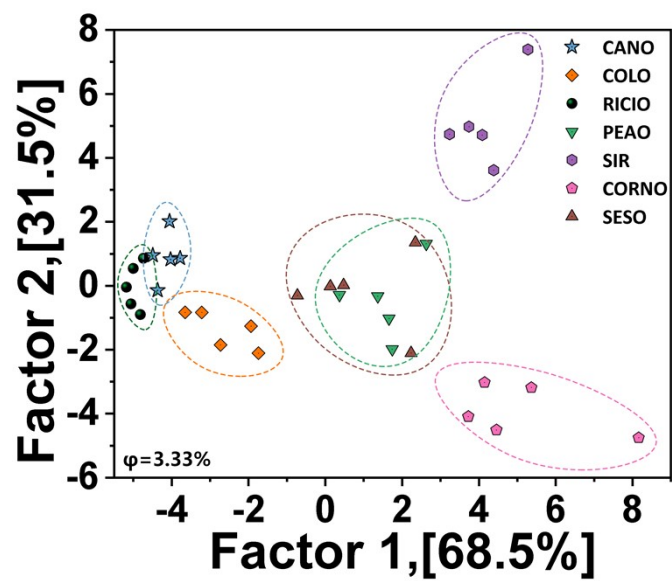

**Figure S2.** Canonical score plots for colorimetric response patterns obtained with the sensor array against 3.33% edible oils.

**Table S1** Peroxide number of edible oils.

| Edible oils | Peroxide number (g/100g) |
|-------------|--------------------------|
| CANO        | 0.1158                   |
| COLO        | 0.1204                   |
| RICIO       | 0.0479                   |
| PEAO        | 0.1042                   |
| SIR         | 0.1136                   |
| CORNO       | 0.1005                   |
| SESO        | 0.0252                   |
